# Supplementary material for: Ursodeoxycholic Acid Alters Bile Acid and Fatty Acid Profiles in a Mouse Model of Diet-Induced Obesity
Source: PubMed Central journal article supplement (PMC6669341; doi:10.3389/fphar.2019.00842), 2019-07-25
Supplement: DataSheet_1.pdf [file DataSheet_1.pdf]

## Supplementary materials

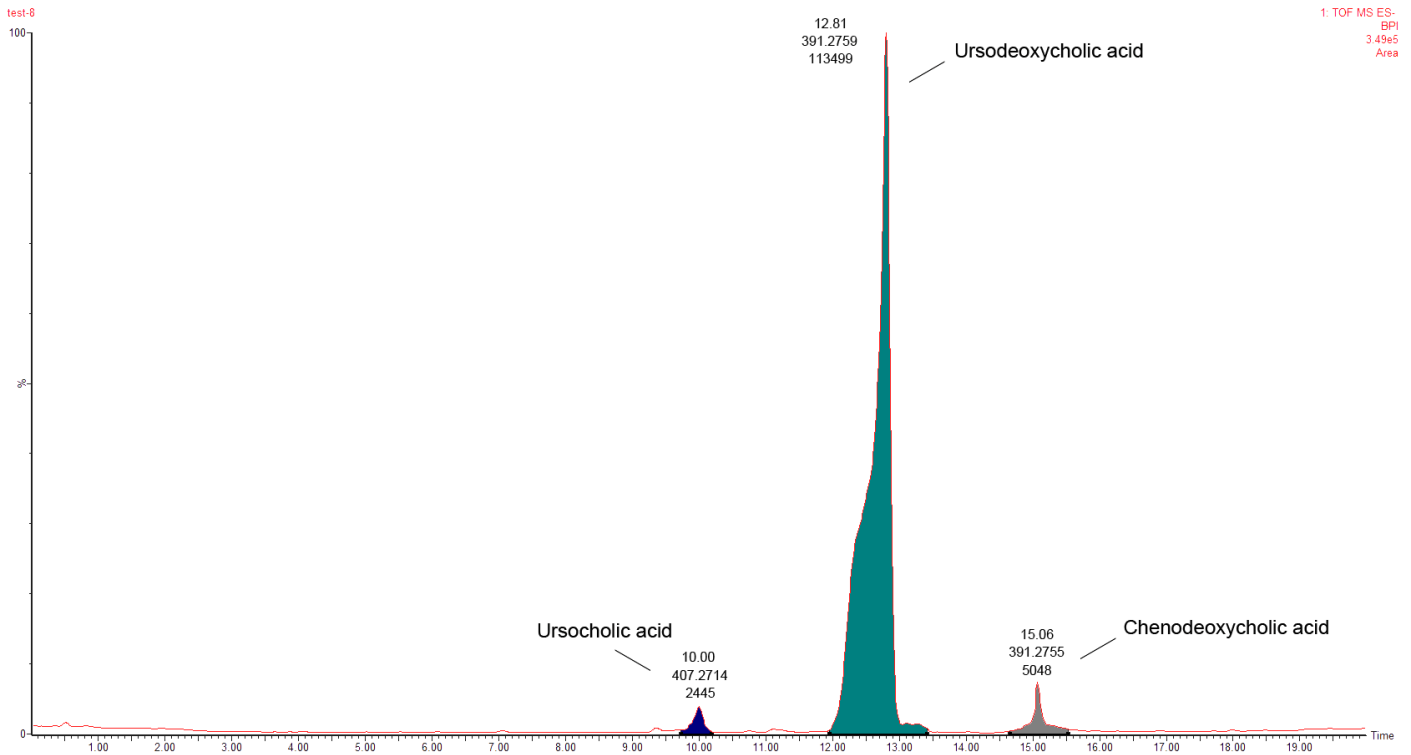

**Supplementary Figure 1. Chromatograms of the dominating compounds in the drug UDCA that we used in the animal experiment.**

The drug UDCA we used in the animal experiment was detected by UPLC-QTOF-MS, and we determined the purity of UDCA was about 94% according to the peak area, and two impurities were found, which were chenodeoxycholic acid (4%) and ursocholic acid (2%) respectively.

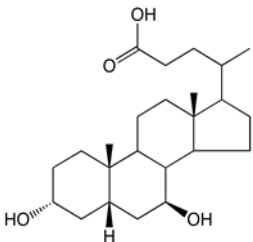

**Supplementary Figure 2. The structure of UDCA.**

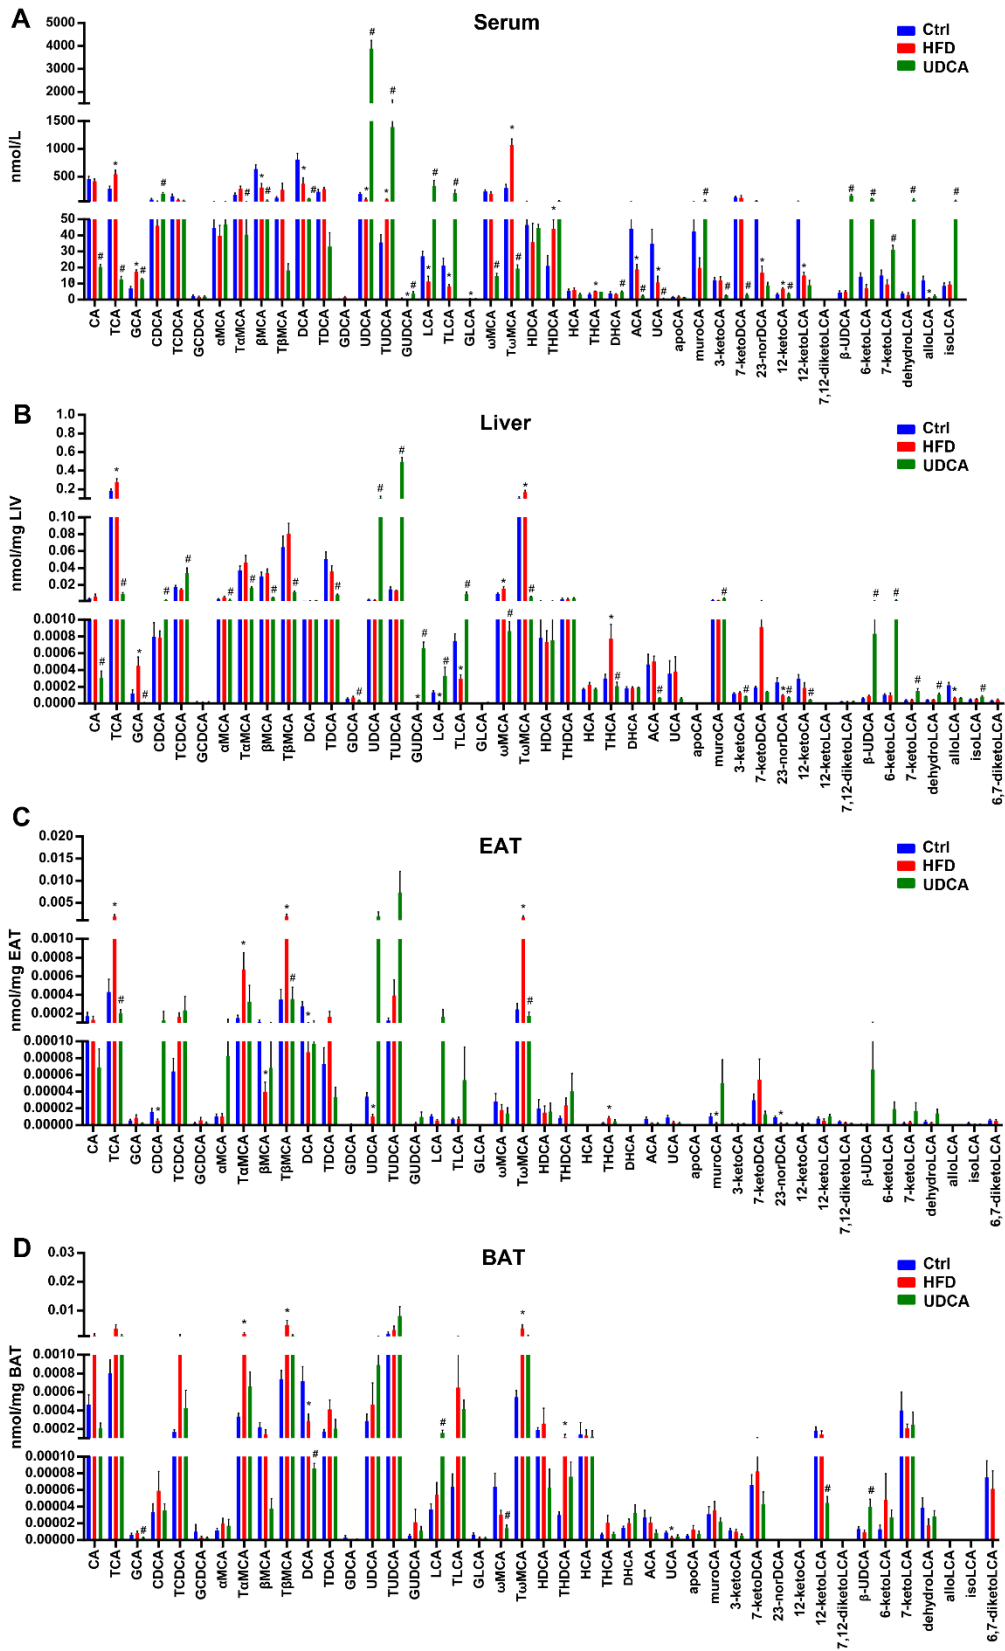

**Supplementary Figure 3. BA concentrations in different tissues.** (A–D) Concentration of individual BAs in serum (A), liver (B), EAT (C), and BAT (D). Ctrl, control group; HFD, 60% fat diet; UDCA, HFD with 0.5% UDCA. \*P < 0.05 vs. control (ctrl) group; #P < 0.05 vs. HFD group.

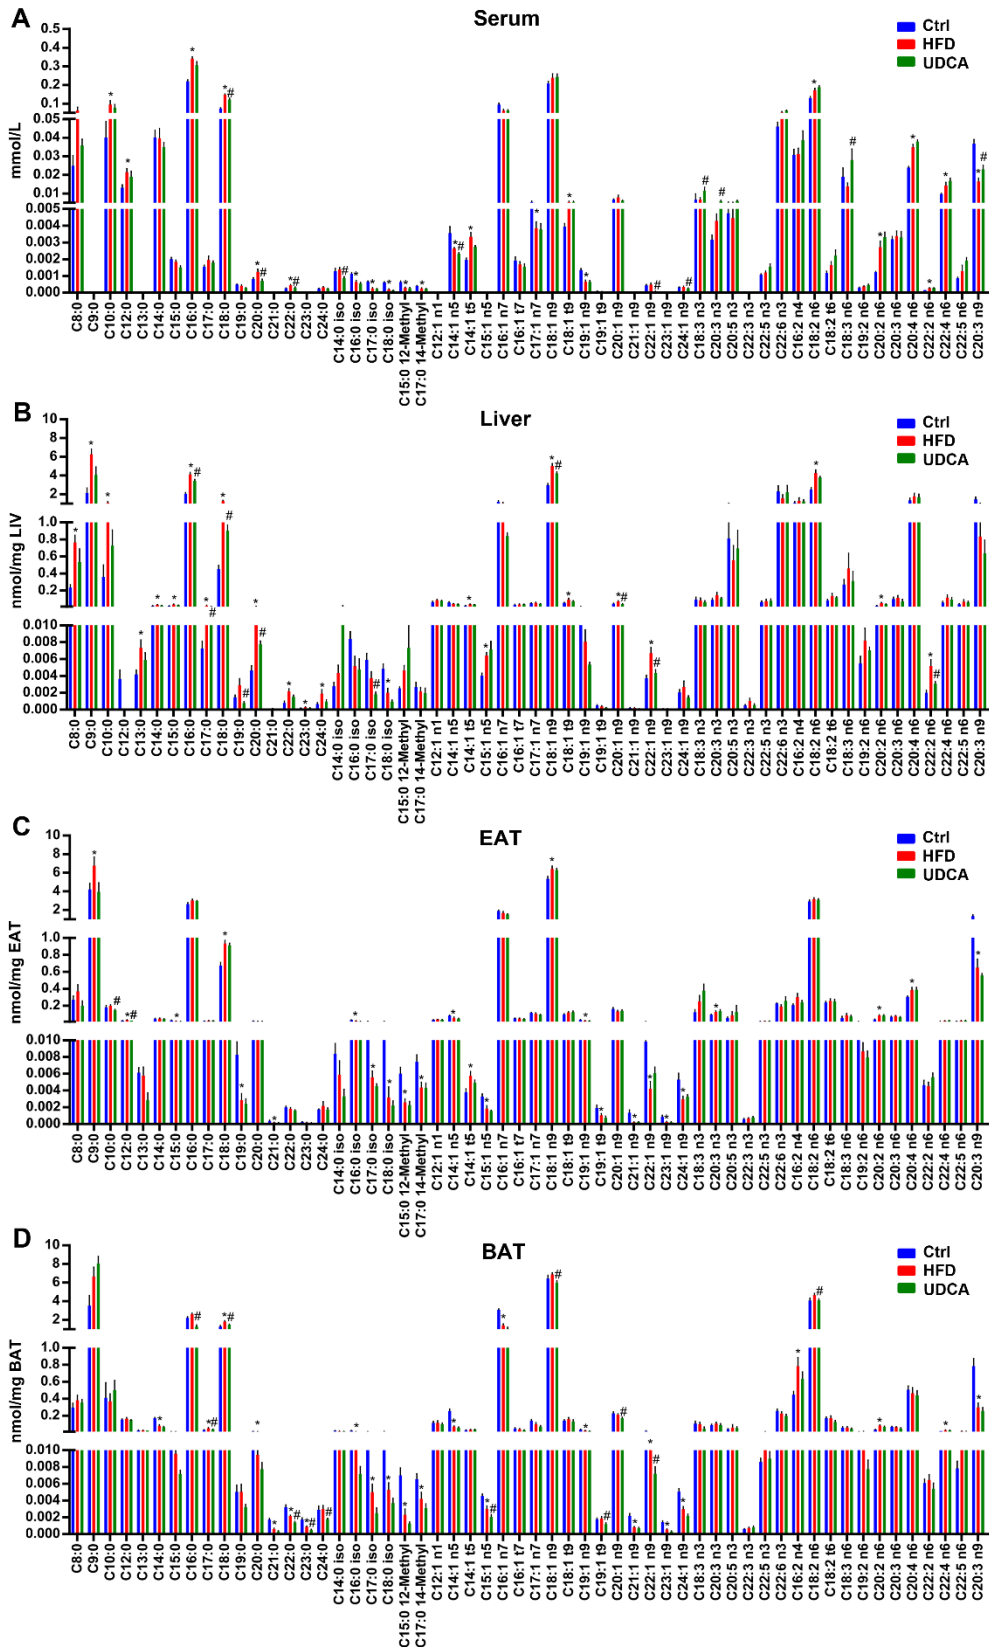

**Supplementary Figure 4. Concentration of individual FFAs in different tissues.** (A–D) Concentration of individual FFAs in serum (A), liver (B), EAT (C), and BAT (D). Ctrl, control group; HFD, 60% fat diet; UDCA, HFD with 0.5% UDCA. \* $P < 0.05$  vs. control (ctrl) group; # $P < 0.05$  vs. HFD group.

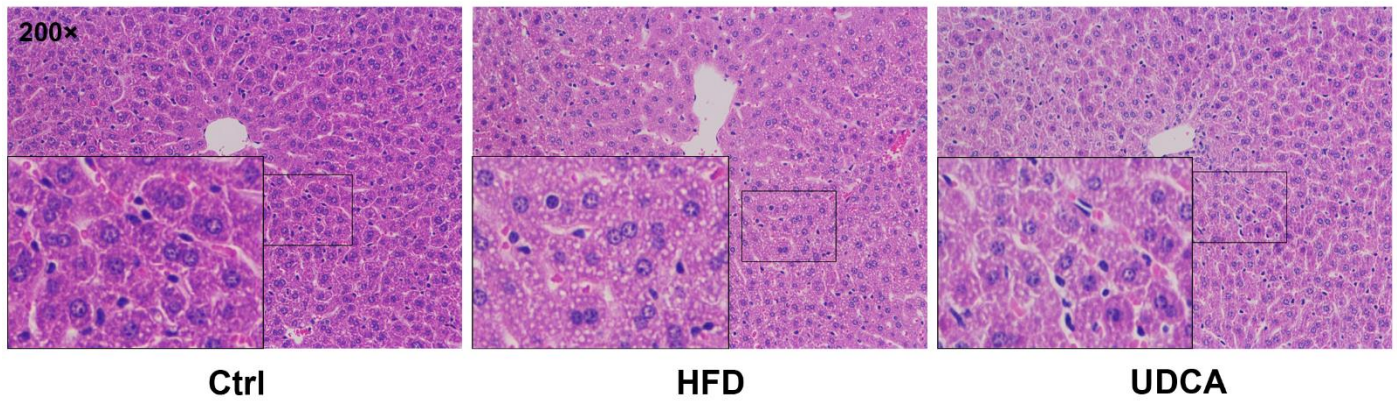

**Supplementary Figure 5. HE staining of liver section of mice (200× magnification).**

**Supplementary Table 1. The gradient of mobile phase for bile acids detection**

| Gradient | %A | %B | Flow (mL/min) | Time (min) |
|----------|----|----|---------------|------------|
| 1        | 80 | 20 | 0.45          | 0.00       |
| 2        | 80 | 20 | 0.45          | 2.00       |
| 3        | 75 | 25 | 0.45          | 3.00       |
| 4        | 75 | 25 | 0.45          | 6.00       |
| 5        | 65 | 35 | 0.45          | 8.00       |
| 6        | 65 | 35 | 0.45          | 11.50      |
| 7        | 1  | 99 | 0.45          | 18.00      |
| 8        | 1  | 99 | 0.45          | 19.00      |
| 9        | 80 | 20 | 0.45          | 19.10      |
| 10       | 80 | 20 | 0.45          | 20.00      |

**Supplementary Table 2. The parameters of mass spectrometer for bile acids detection**

| Bile acids      | Full name                       | Parent m/z | Daughter m/z |
|-----------------|---------------------------------|------------|--------------|
| CA              | cholic acid                     | 407.35     | 407.35       |
| TCA             | taurocholate acid               | 514.35     | 79.93        |
| GCA             | glycocholic acid                | 464.35     | 73.93        |
| CDCA            | chenodeoxycholic acid           | 391.35     | 391.35       |
| TCDC            | taurochenodeoxycholic acid      | 498.41     | 79.93        |
| GCDCA           | glycochenodeoxycholic acid      | 448.41     | 73.94        |
| $\alpha$ -MCA   | $\alpha$ -muricholic acid       | 407.35     | 407.35       |
| T $\alpha$ -MCA | tauro $\alpha$ -muricholic acid | 514.35     | 79.93        |
| $\beta$ -MCA    | $\beta$ -muricholic acid        | 407.35     | 407.35       |
| T $\beta$ -MCA  | tauro $\beta$ -muricholic acid  | 514.35     | 79.93        |
| UDCA            | ursodeoxycholic acid            | 391.35     | 391.35       |
| TUDCA           | tauroursodeoxycholic acid       | 498.41     | 79.93        |
| GUDCA           | glycoursodeoxycholic acid       | 448.41     | 73.94        |
| LCA             | lithocholic acid                | 375.35     | 375.35       |
| TLCA            | tauroolithocholic acid          | 482.41     | 79.93        |
| GLCA            | glycolithocholic acid           | 432.41     | 73.94        |
| DCA             | deoxycholic acid                | 391.35     | 391.35       |
| TDCA            | taurodeoxycholate acid          | 498.41     | 79.93        |
| GDCA            | glycodeoxycholic acid           | 448.41     | 73.94        |
| $\omega$ -MCA   | $\omega$ -muricholic acid       | 407.35     | 407.35       |

|                 |                                 |        |        |
|-----------------|---------------------------------|--------|--------|
| T $\omega$ -MCA | tauro $\omega$ -muricholic acid | 514.35 | 79.93  |
| HDCA            | hyodeoxycholic acid             | 391.35 | 391.35 |
| THDCA           | taurohyodeoxycholic acid        | 498.41 | 79.93  |
| GHDCA           | glycohyodeoxycholic acid        | 448.41 | 73.94  |
| HCA             | hyocholic acid                  | 407.35 | 407.35 |
| THCA            | taurohyocholic acid             | 514.35 | 79.93  |
| GHCA            | glycohyocholic acid             | 464.35 | 73.93  |
| 7-ketoDCA       | 7-ketodeoxycholic acid          | 405.35 | 405.35 |
| ACA             | allocholic acid                 | 407.35 | 407.35 |
| DHLCA           | dehydrocholic acid              | 373.3  | 373.3  |
| alloLCA         | allolithocholic acid            | 375.35 | 375.35 |
| isoLCA          | isolithocholic acid             | 375.35 | 375.35 |
| 23-norDCA       | 23-nordeoxycholic acid          | 377.35 | 377.35 |
| 6-ketoLCA       | 6-ketolithocholic acid          | 389.35 | 389.35 |
| 7-ketoLCA       | 7-ketolithocholic acid          | 389.35 | 389.35 |
| 12-ketoLCA      | 12-ketolithocholic acid         | 389.35 | 389.35 |
| apoCA           | apocholic acid                  | 389.35 | 389.35 |
| muroCA          | murocholic acid                 | 391.35 | 391.35 |
| $\beta$ -UDCA   | 3 $\beta$ -ursodeoxycholic acid | 391.35 | 391.35 |
| 6, 7-diketoLCA  | 6,7-diketolithocholic acid      | 403.35 | 403.35 |
| 3-ketoCA        | 3-dehydrocholic acid            | 405.35 | 405.35 |
| 7, 12-diketoLCA | 7,12-diketolithocholic acid     | 403.35 | 403.35 |
| 12-ketoCA       | 12-ketocholic acid              | 405.35 | 405.35 |
| UCA             | ursocholic acid                 | 407.35 | 407.35 |
| $\beta$ -CA     | 3 $\beta$ -cholic Acid          | 407.35 | 343.3  |
| isoDCA          | isodeoxycholic acid             | 391.35 | 391.35 |
| DHCA            | dehydrolithocholic acid         | 401.35 | 401.35 |
| TDHCA           | taurodehydrocholic acid         | 508.41 | 79.93  |
| GDHCA           | glycodehydrocholic acid         | 458.35 | 73.93  |
| d4-CA           |                                 | 411.35 | 411.35 |
| d4-LCA          |                                 | 379.41 | 379.41 |
| d4-UDCA         |                                 | 395.41 | 395.41 |
| d4-GCA          |                                 | 468.41 | 73.94  |
| d4-GDCA         |                                 | 452.41 | 73.93  |
| d4-GCDCA        |                                 | 452.41 | 73.93  |

**Supplementary Table 3. The gradient of mobile phase for free fatty acids detection**

| Gradient | %A  | %B   | Flow (mL/min) | Time (min) |
|----------|-----|------|---------------|------------|
| 1        | 30  | 70   | 0.4           | 0          |
| 2        | 30  | 70   | 0.4           | 2.0        |
| 3        | 25  | 75   | 0.4           | 5.0        |
| 4        | 20  | 80   | 0.4           | 10.0       |
| 5        | 10  | 90   | 0.4           | 13.0       |
| 6        | 0.5 | 99.5 | 0.4           | 16.0       |
| 7        | 0.5 | 99.5 | 0.4           | 21.0       |
| 8        | 30  | 70   | 0.4           | 22.5       |
| 9        | 30  | 70   | 0.4           | 24.0       |
